# Supplementary material
Source: publisher figshare collection journal article supplement (https://sage.figshare.com/ndownloader/files/13836761)
Supplement: Supplementary file 1 [file 13836761]

**Supplemental table 1.** Frequency of SPC by cause of death.

| <b>Cause of Death</b>         | <b>Frequency of SPC</b> |
|-------------------------------|-------------------------|
| Cardiogenic shock             | 36% (49/136)            |
| Anoxic brain injury           | 4% (1/23)               |
| Respiratory failure           | 26% (5/19)              |
| Sepsis                        | 33% (6/18)              |
| Stroke or brain bleed         | 31% (4/13)              |
| Ventricular arrhythmia or PEA | 30% (3/10)              |
